# Supplementary material for: Bioinspired artificial exosomes based on lipid nanoparticles carrying let-7b-5p promote angiogenesis in vitro and in vivo
Source: PubMed Central journal article supplement — Mol Ther. 2021 Mar 18;29(7):2239–52. doi: 10.1016/j.ymthe.2021.03.015 (PMC8261169; doi:10.1016/j.ymthe.2021.03.015), 2021-03-18
Supplement: mmc1.pdf [file mmc1.pdf]

## Supplemental Information

### **Bioinspired artificial exosomes based on lipid nanoparticles carrying let-7b-5p promote angiogenesis *in vitro* and *in vivo***

**Sezin Aday, Inbal Hazan-Halevy, Aranzazu Chamorro-Jorganes, Maryam Anwar, Meir Goldsmith, Nicholas Beazley-Long, Susmita Sahoo, Navneet Dogra, Walid Sweaad, Francesco Catapano, Sho Ozaki-Tan, Gianni D. Angelini, Paolo Madeddu, Andrew V. Benest, Dan Peer, and Costanza Emanuelli**

## Supplemental Figures

Figure S1

A

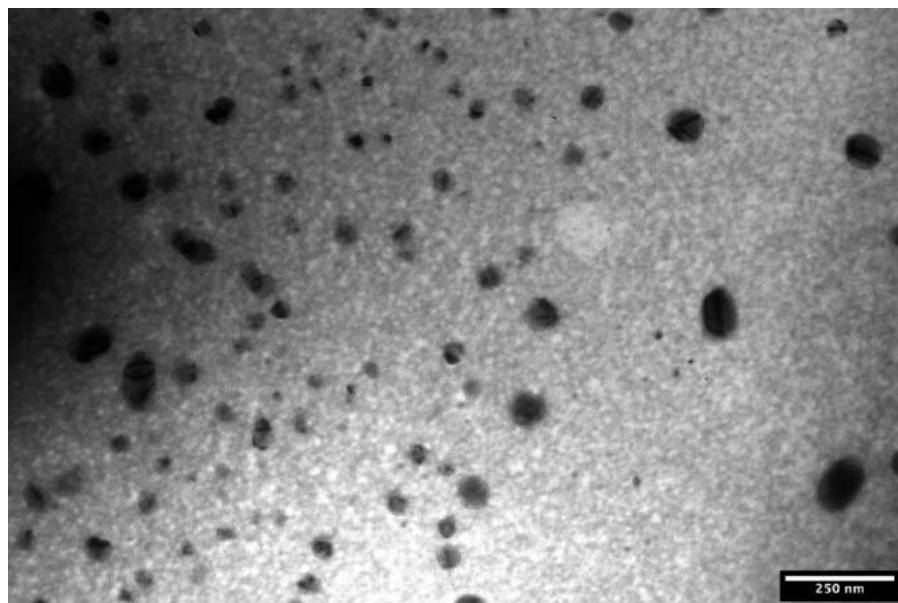

B

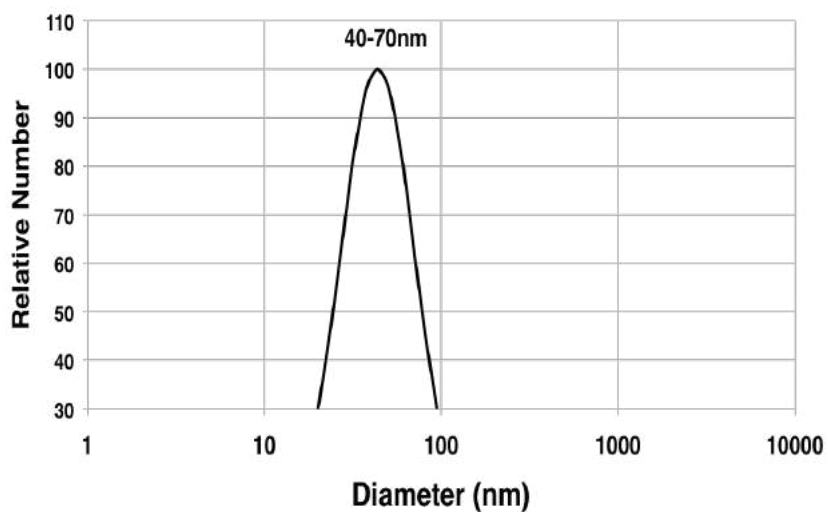

**Figure S1. Further Characterization of Pericyte (hSVP) EVs by Transmission Electron Microscopy (TEM) and Dynamic Light Scattering (DLS).** (A) TEM image shows the characteristic size distribution of hSVP EVs. Scale bar, 250 nm. (B) DLS size distribution measurement of isolated hSVP EVs demonstrates a single peak (in the range of 40–110 nm diameter) indicating they are free of contamination.

Figure S2

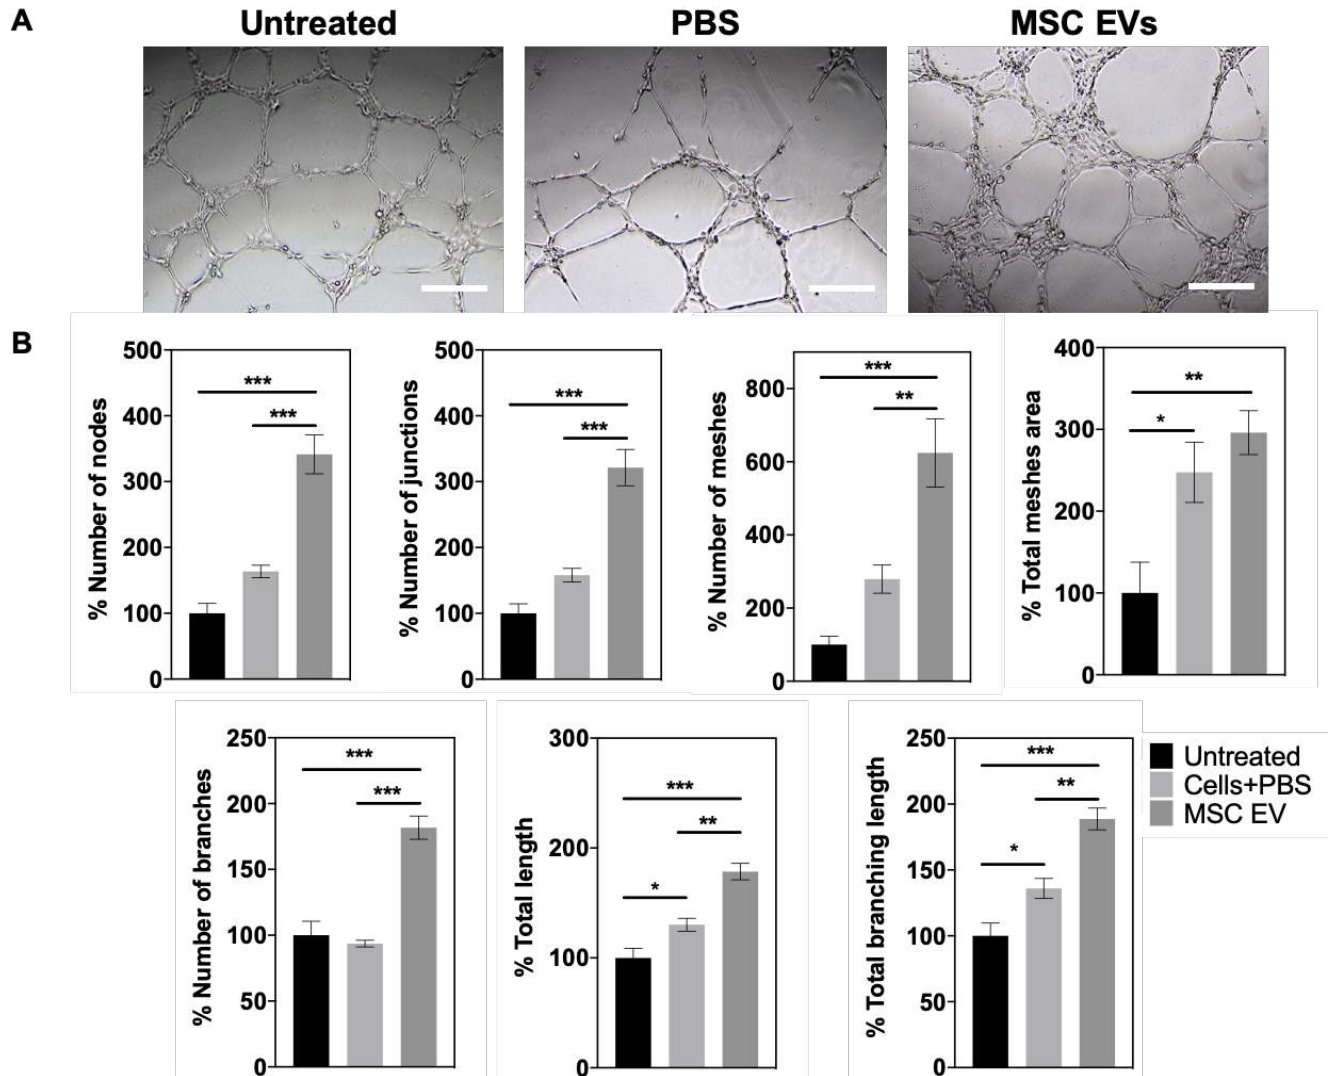

**Figure S2. MSC EVs increase sprouting of HUVECs on Matrigel.** (A) Matrigel figures for untreated, PBS-treated and MSC EV-treated HUVECs. Scale bars, 200 $\mu$ m. (B) Evaluation of different parameters in Matrigel assay using ImageJ Angiogenesis Analyzer tool. In all graphs, values are given as average  $\pm$  SEM (n=6-8). \* $P \leq 0.05$ , \*\* $P \leq 0.01$ , \*\*\* $P \leq 0.001$ , and \*\*\*\* $P \leq 0.0001$ .

Figure S3

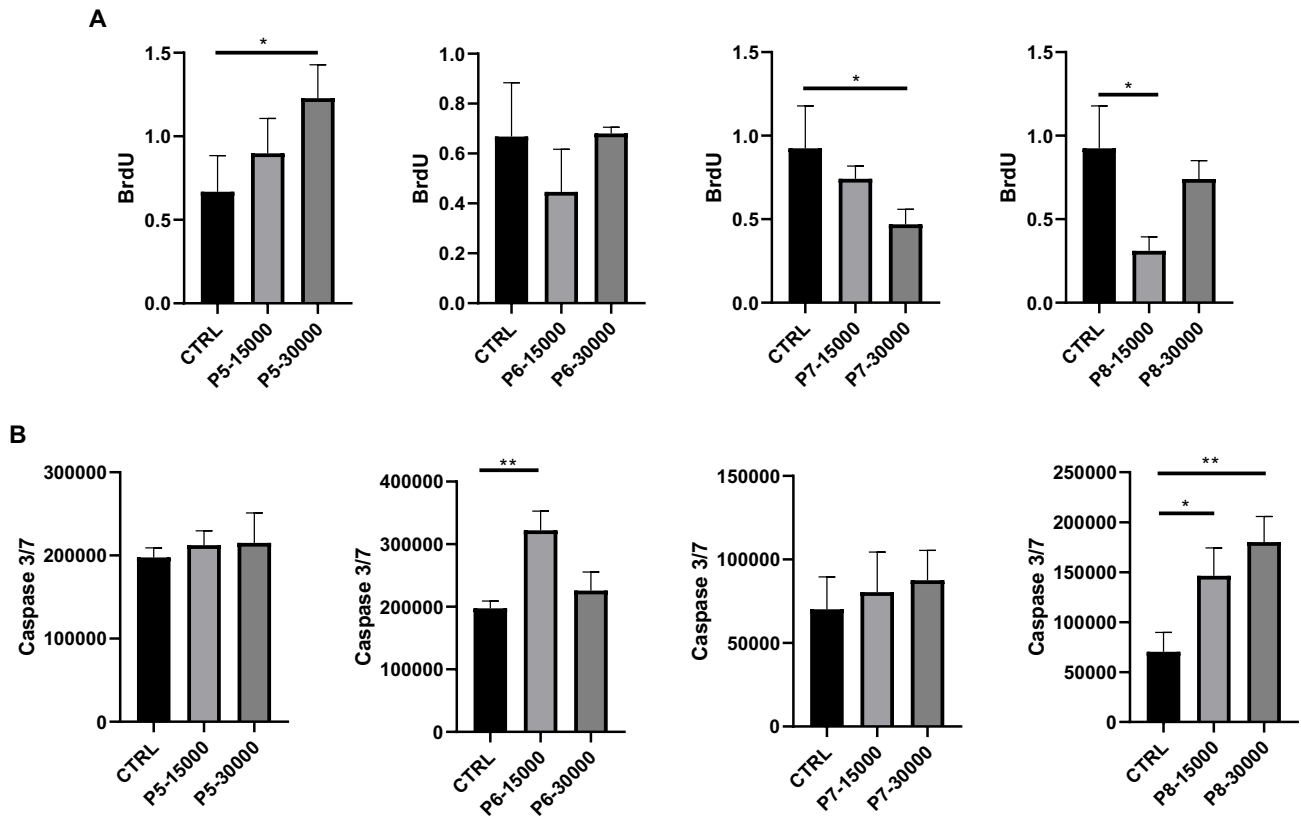

**Figure S3. Function of MSC-sEVs depends on the passage number.** (A) HUVECs proliferation and (B) HUVECs apoptosis after 48 h incubation with MSC-sEVs at P5-8 at two different concentrations ( $1.5 \times 10^4$  and  $3 \times 10^4$  nanoparticles). Proliferation was measured by BrdU incorporation and apoptosis by Caspase-3 activity assay. In all graphs, values are given as average  $\pm$  SEM (n=4). \*p  $\leq$  0.05 and \*\*p  $\leq$  0.001.

Figure S4

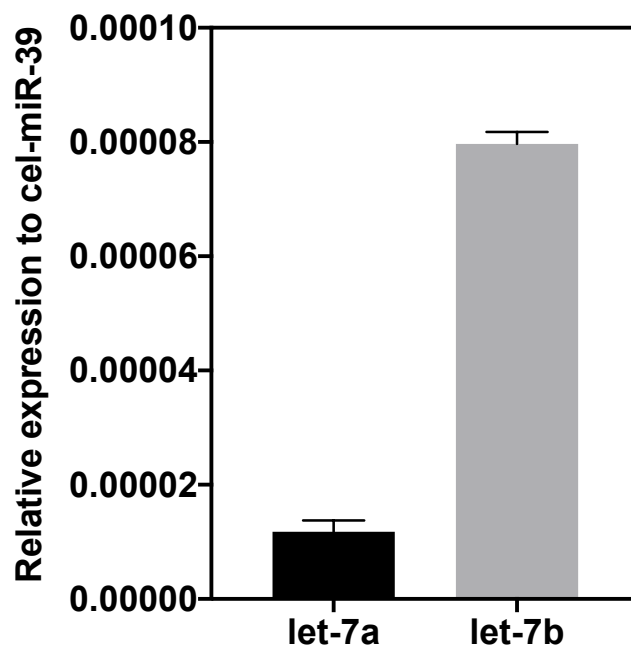

**Figure S4.** Relative (to spike-in Cel-miR-39) expression of let-7a and let-7b in MSC sEVs. Values are given as average ± SEM (n=3).

Figure S5

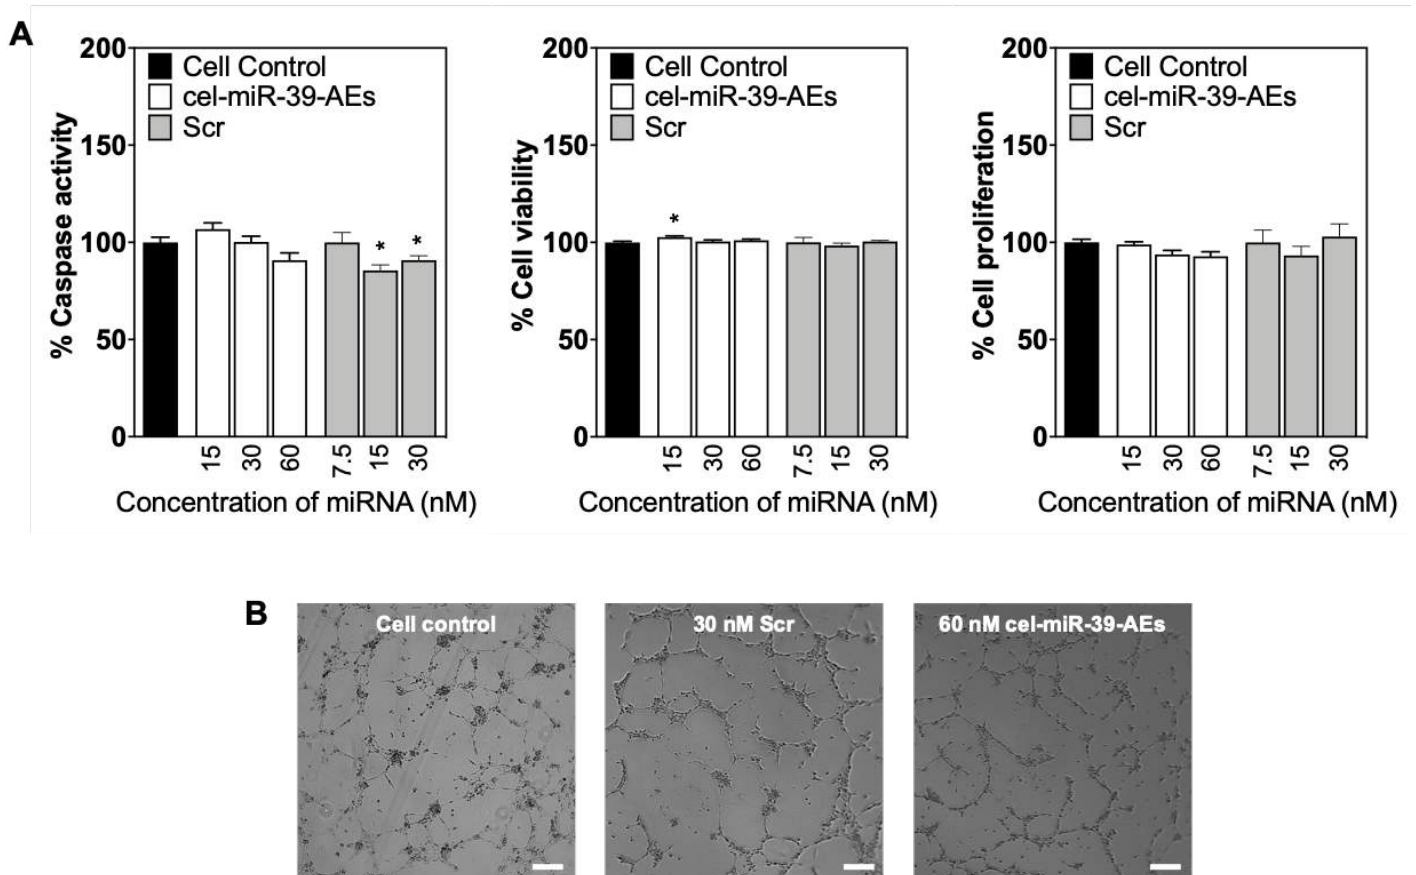

**Figure S5. Cell control data for functional assays.** Scr and cel-miR-39-AE controls used in the experiments do not negatively affect cell survival and proliferation (A) or tubule formation on Matrigel (B) under hypoxic conditions (1% O<sub>2</sub>). Images are given for 30 nM Scr control and 60 nM cel-miR-39-AEs. In experiments with let-7a and let-7b single/double transfection, the highest concentration of miRNA was 30 nM while in the experiments with AEs, it was 60 nM. Even at the highest concentrations, corresponding controls (30 nM Scr control and 60 nM cel-miR-39-AEs) do not negatively affect cell behavior. In all graphs, values are given as average  $\pm$  SEM (n=5-6). \* $P \leq 0.05$ , \*\* $P \leq 0.01$ , \*\*\* $P \leq 0.001$ , and \*\*\*\* $P \leq 0.0001$ . Scale bars, 200 $\mu$ m.

Figure S6

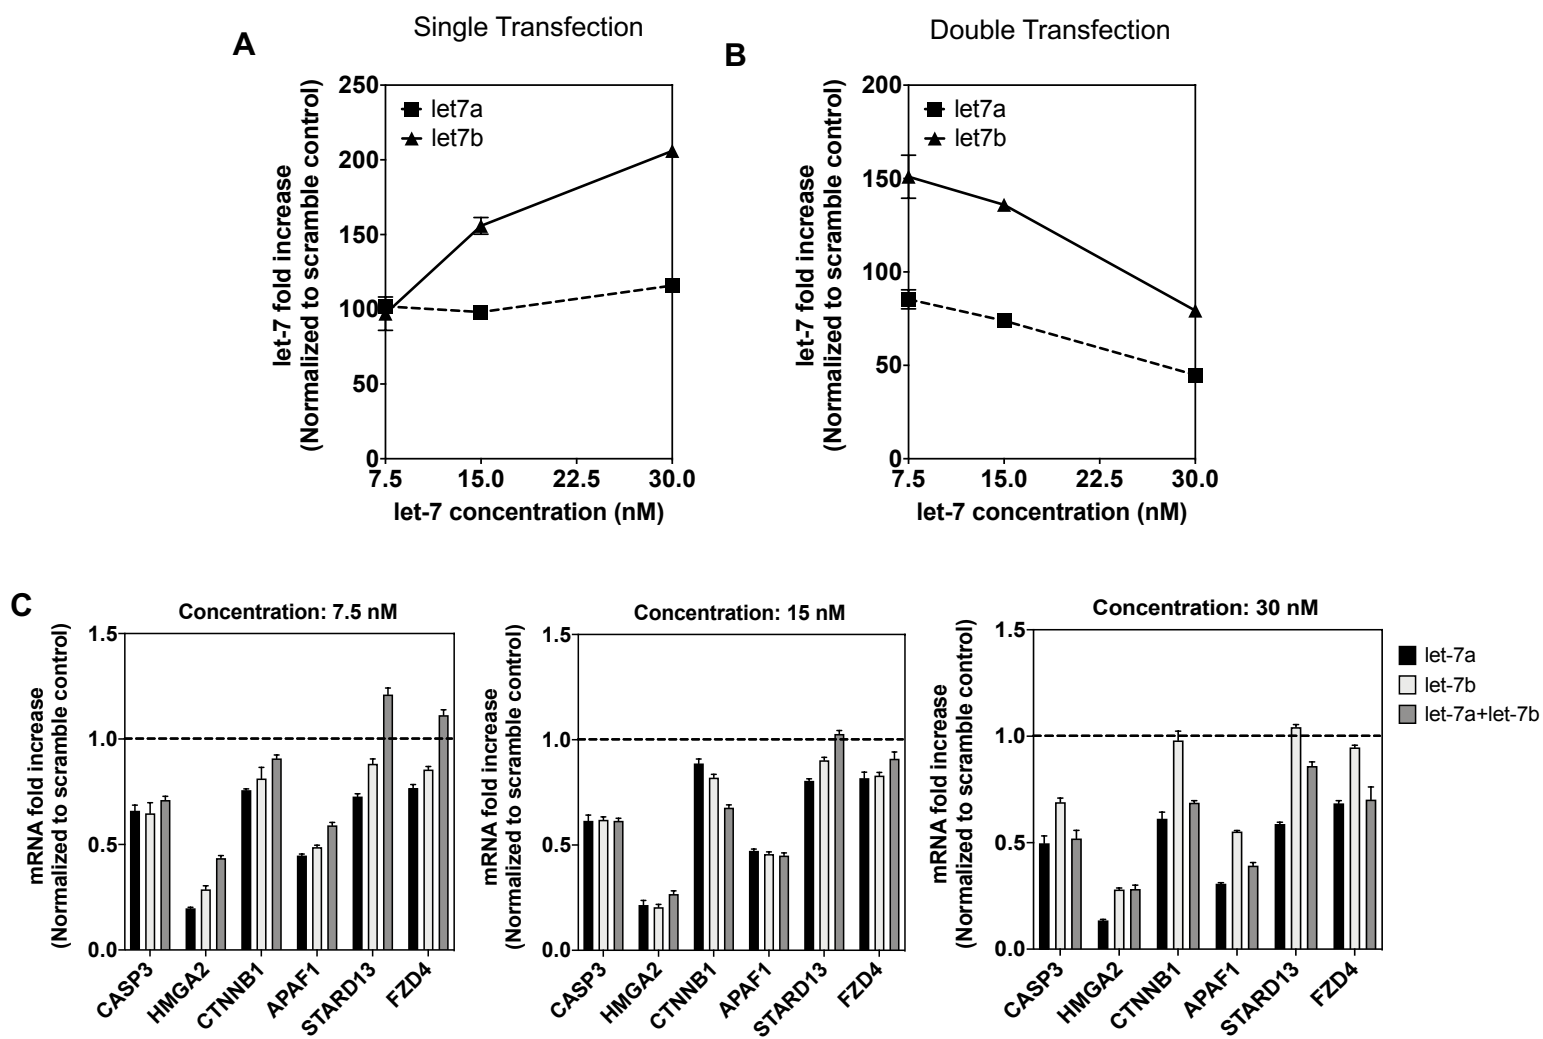

**Figure S6. Kinetics of expression for let-7a and let-7b and their mutual gene targets.** (A) let-7a or let-7b expression when HUVECs are treated with different concentrations of single (i.e. let-7a or let-7b) miRNAs. (B) Co-transfection of let-7a and let-7b show different kinetics compared with single transfections. (C) let-7 transfection effectively downregulates mutual gene targets after 24 h. In all graphs, values are given as average  $\pm$  SEM (n=4). \* $P \leq 0.05$ , \*\* $P \leq 0.01$ , \*\*\* $P \leq 0.001$ , and \*\*\*\* $P \leq 0.0001$ .

Figure S7

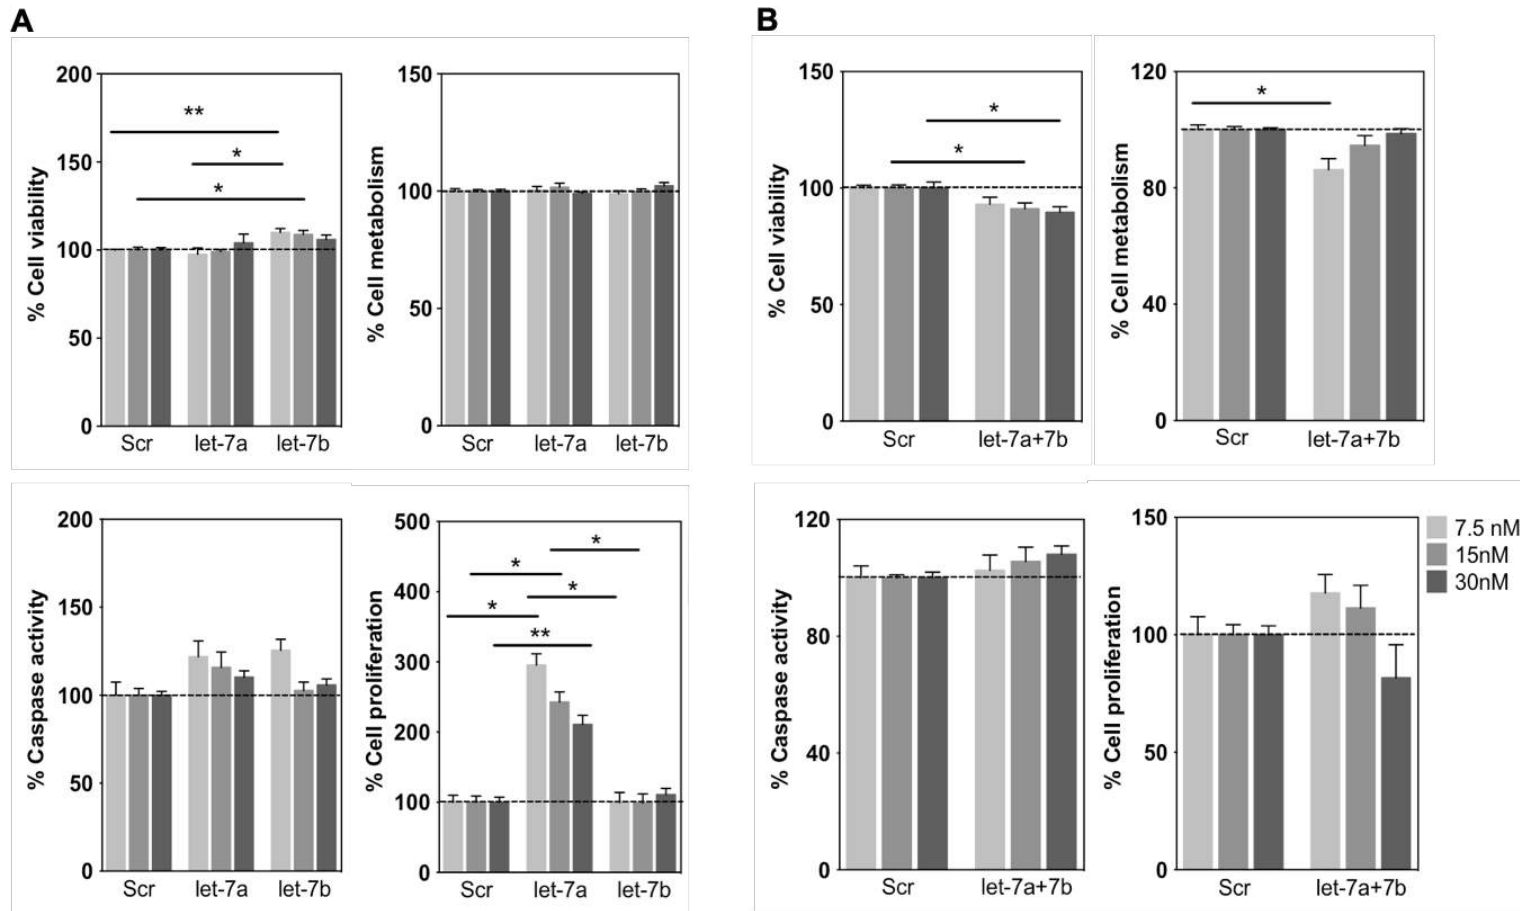

**Figure S7. The effect of let-7a, let-7b and dual transfection of them on HUVEC activity under hypoxia (1% O<sub>2</sub>).** (A) Neither let-7a nor let-7b negatively affect HUVEC activity. (B) Dual transfection of let-7a and let-7b decreases cell viability and metabolism. In all graphs, values are given as average  $\pm$  SEM (n=5-10). \* $P \leq 0.05$ , \*\* $P \leq 0.01$ , \*\*\* $P \leq 0.001$ , and \*\*\*\* $P \leq 0.0001$ .



Figure S8

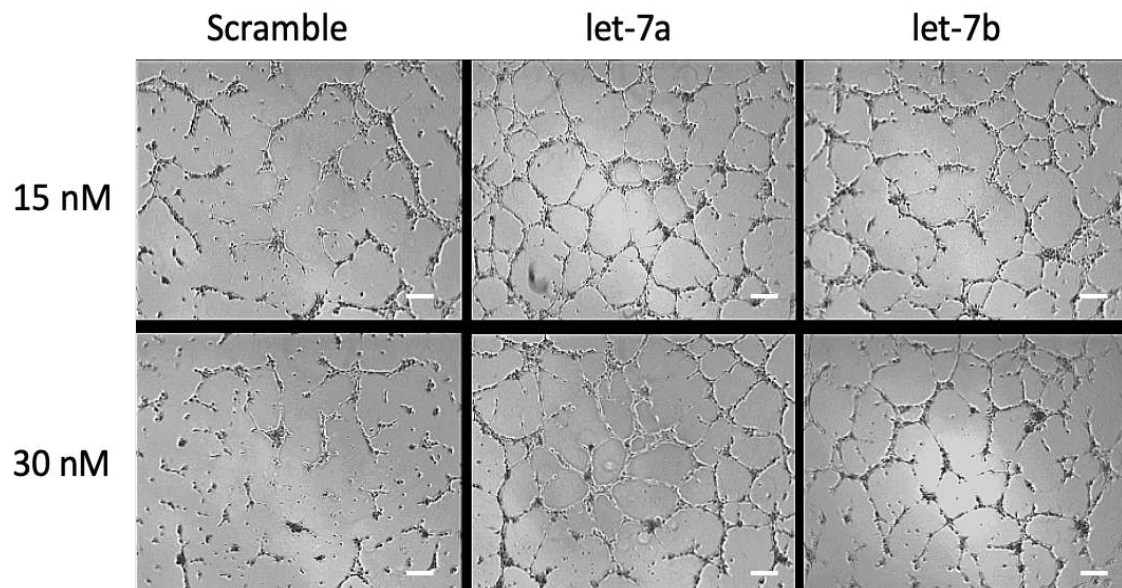

**Figure S8. Matrigel figures for let-7a- or let-7b-treated HUVECs under hypoxia (1% O<sub>2</sub>). Scale bars, 200µm.**

Figure S9

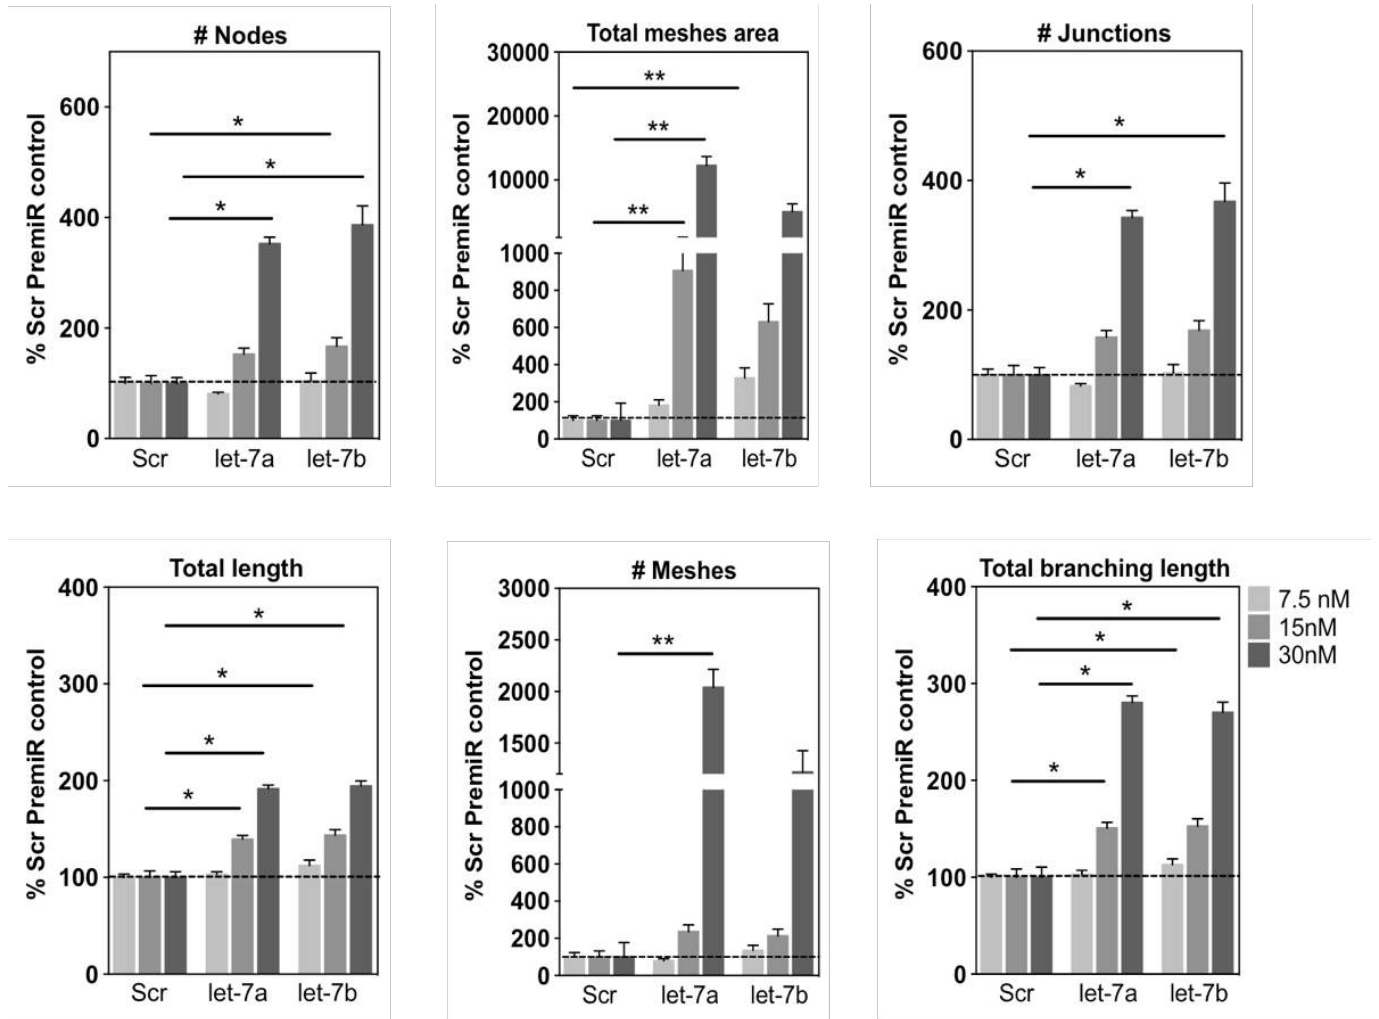

Figure S9. Analysis of different angiogenesis parameters for HUVECs treated with let-7a or let-7b in hypoxia (1% O<sub>2</sub>) using ImageJ Angiogenesis Analyzer tool. In all graphs, values are given as average  $\pm$  SEM (n=5-10). \* $P \leq 0.05$ , \*\* $P \leq 0.01$ , \*\*\* $P \leq 0.001$ , and \*\*\*\* $P \leq 0.0001$ .

Figure S10

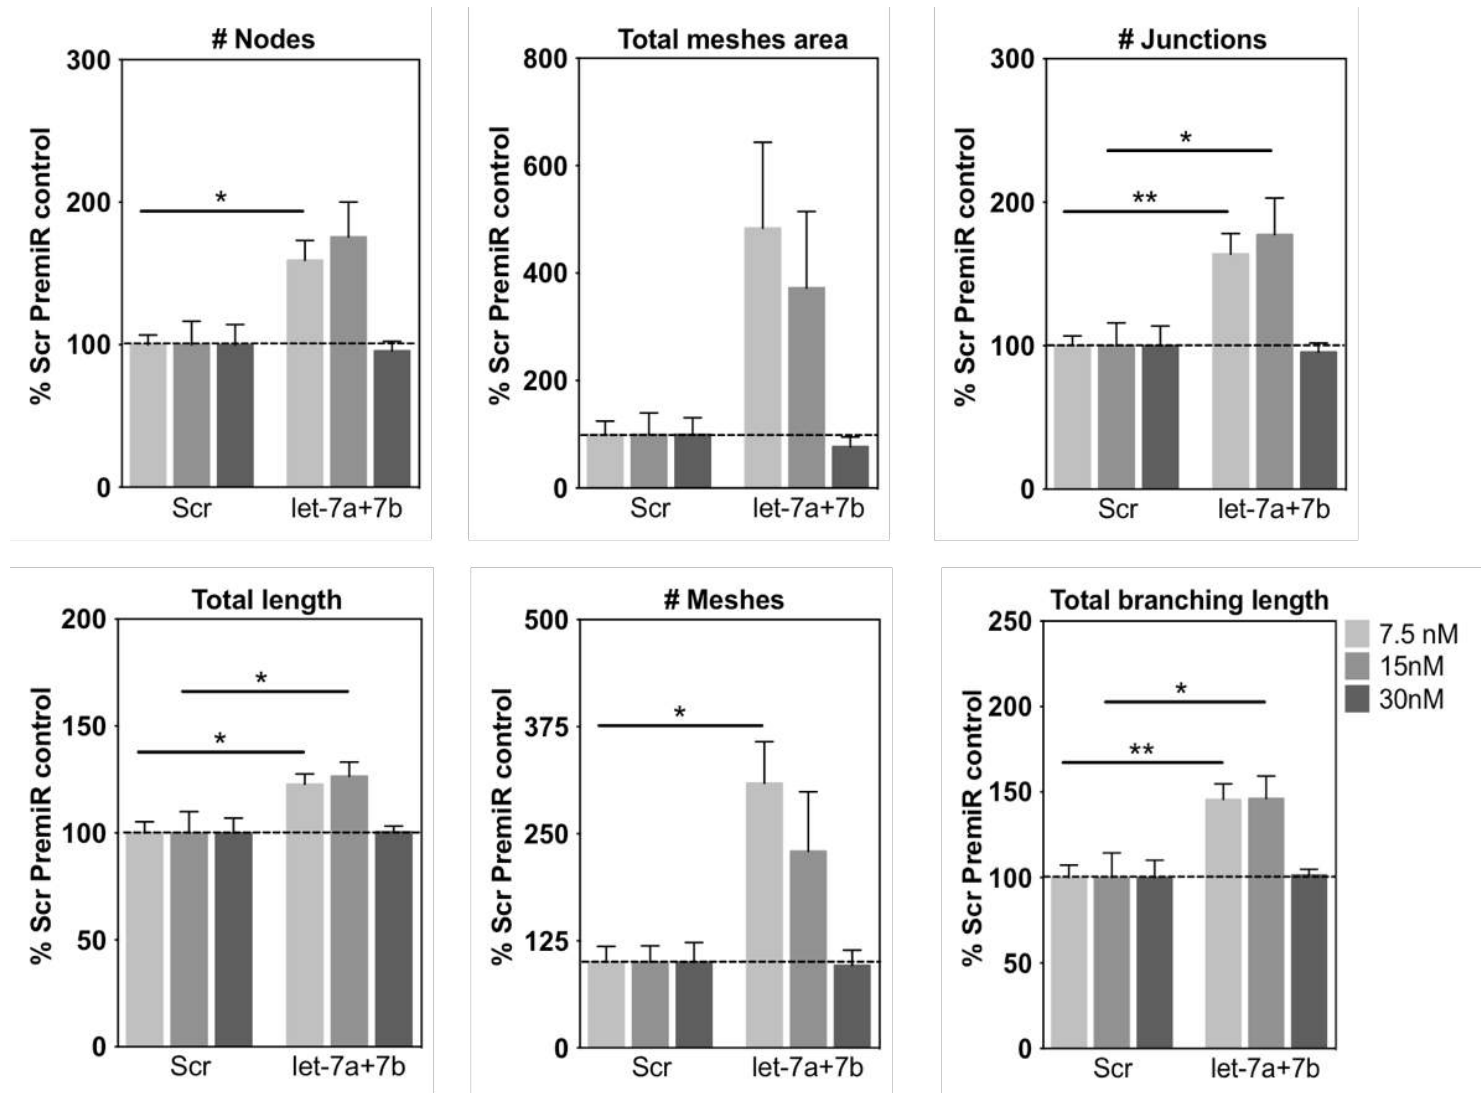

Figure S10. Analysis of different angiogenesis parameters for HUVECs co-transfected with let-7a and let-7b in hypoxia (1% O<sub>2</sub>) using ImageJ Angiogenesis Analyzer tool. In all graphs, values are given as average ± SEM (n=5-10). \*P ≤ 0.05, \*\*P ≤ 0.01, \*\*\*P ≤ 0.001, and \*\*\*\*P ≤ 0.0001.

Figure S11

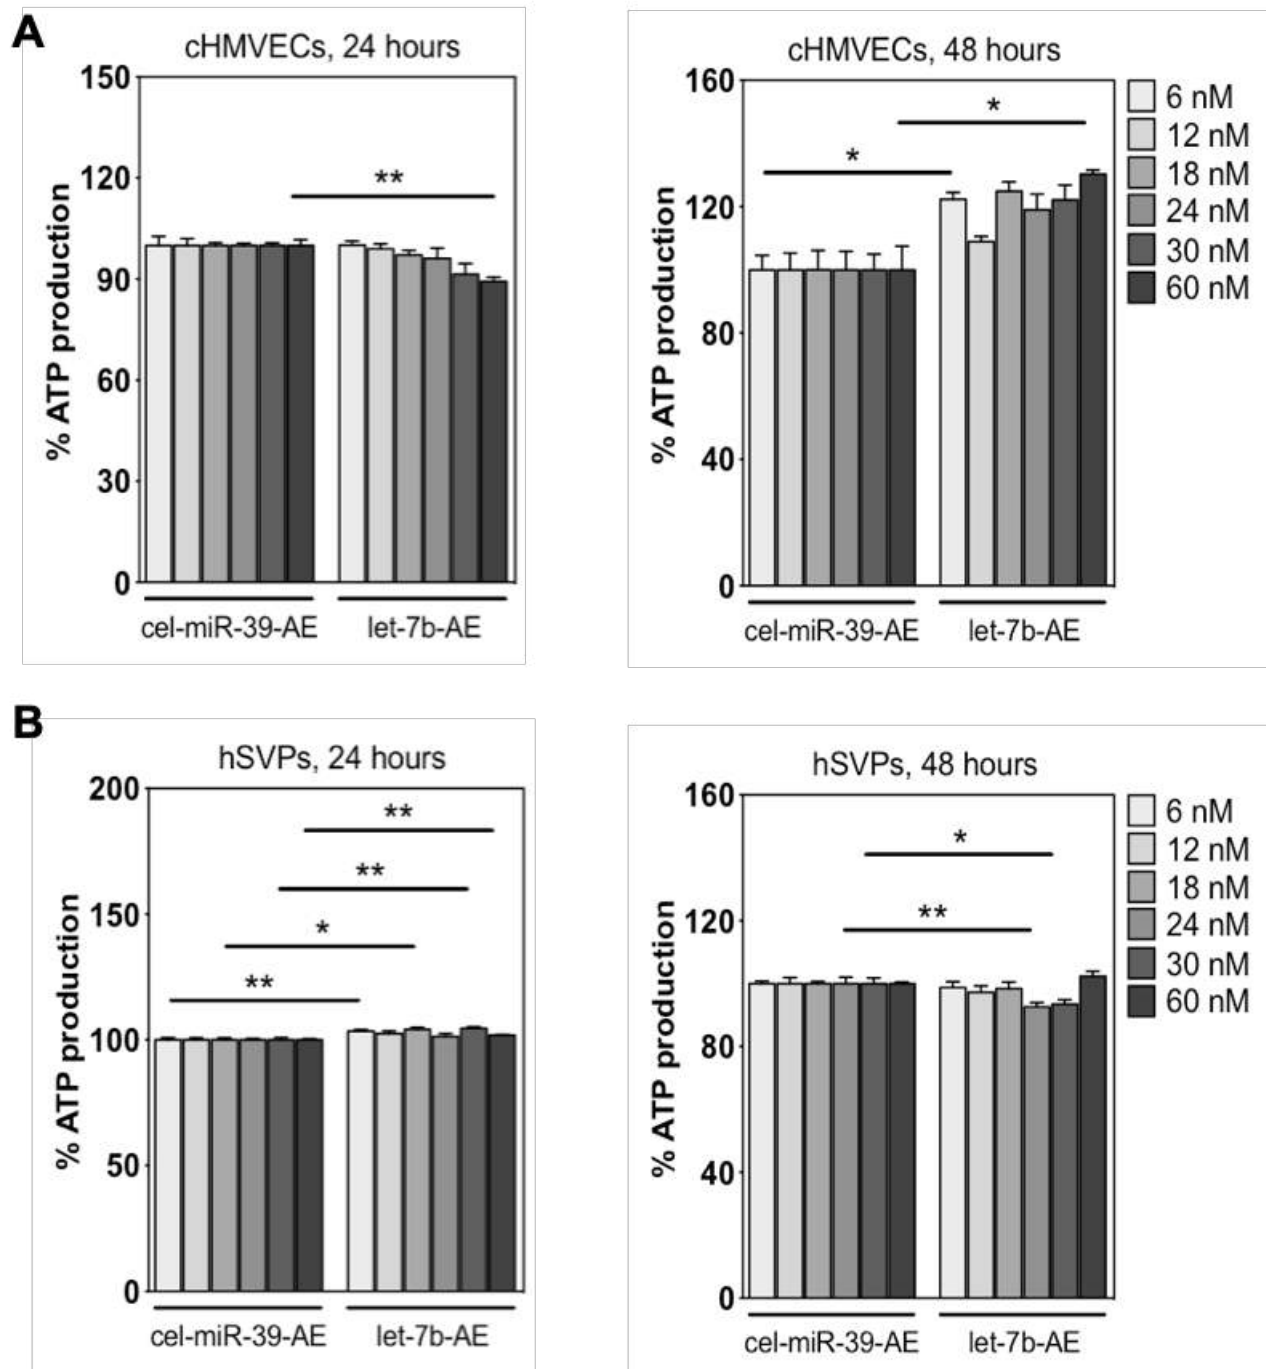

**Figure S11. Analysis of AEs cytotoxic effects on cHMEVs and hSVPs.** AEs do not cause any significant toxicity on (A) cHMEVs or (B) hSVPs up to 48-hour transfection. Cells were cultured under normoxic conditions (20% O<sub>2</sub>). In all graphs, values are given as average  $\pm$  SEM (n=5-10). \* $P \leq 0.05$ , \*\* $P \leq 0.01$ , \*\*\* $P \leq 0.001$ , and \*\*\*\* $P \leq 0.0001$ .

Figure S12

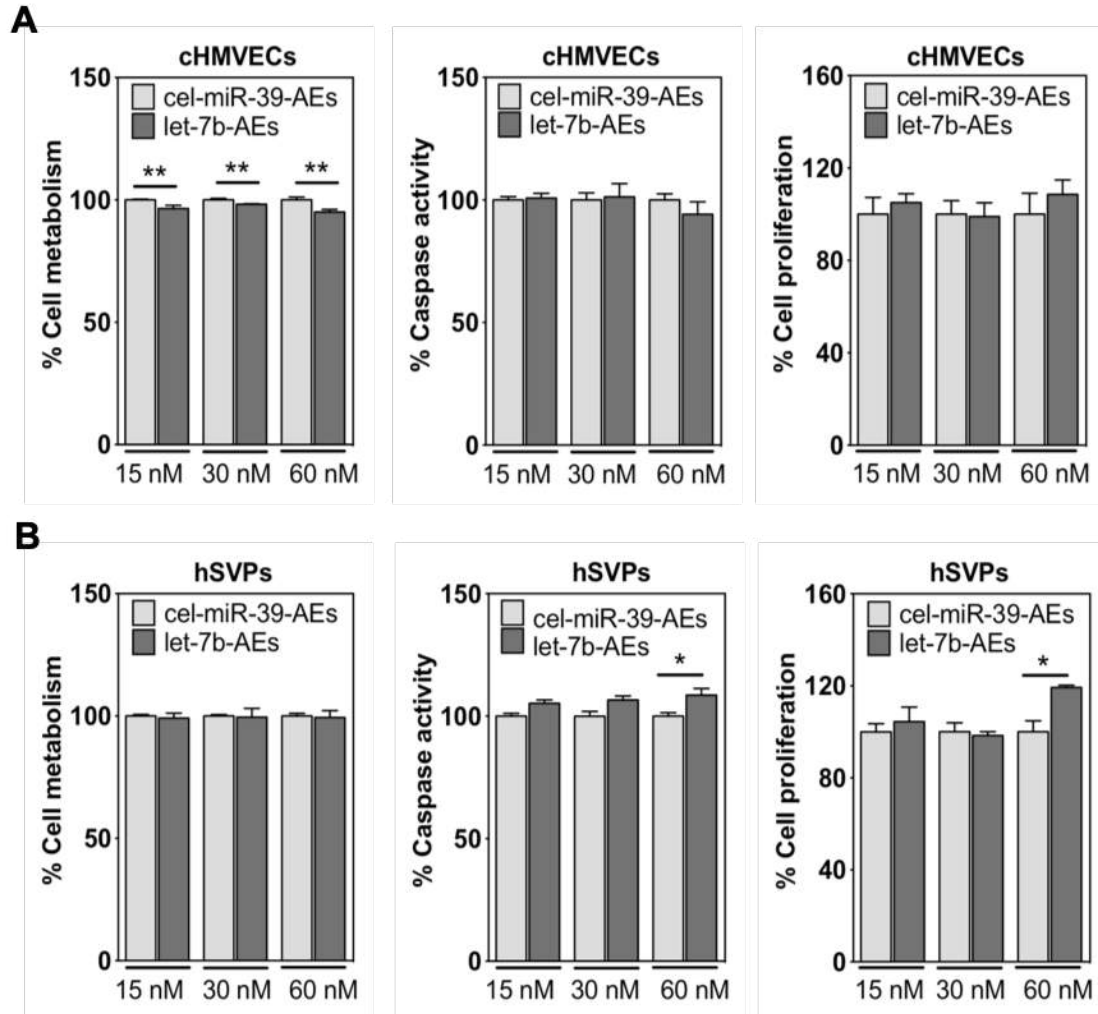

**Figure S12. The effect of AEs on cHMEV and hSVP activities.** AEs have no negative effect on (A) cHMEVs or (B) hSVPs' activity under hypoxic conditions (1% O<sub>2</sub>). In all graphs, values are given as average  $\pm$  SEM (n=4-5). \* $P \leq 0.05$ , \*\* $P \leq 0.01$ , \*\*\* $P \leq 0.001$ , and \*\*\*\* $P \leq 0.0001$ .

Figure S13

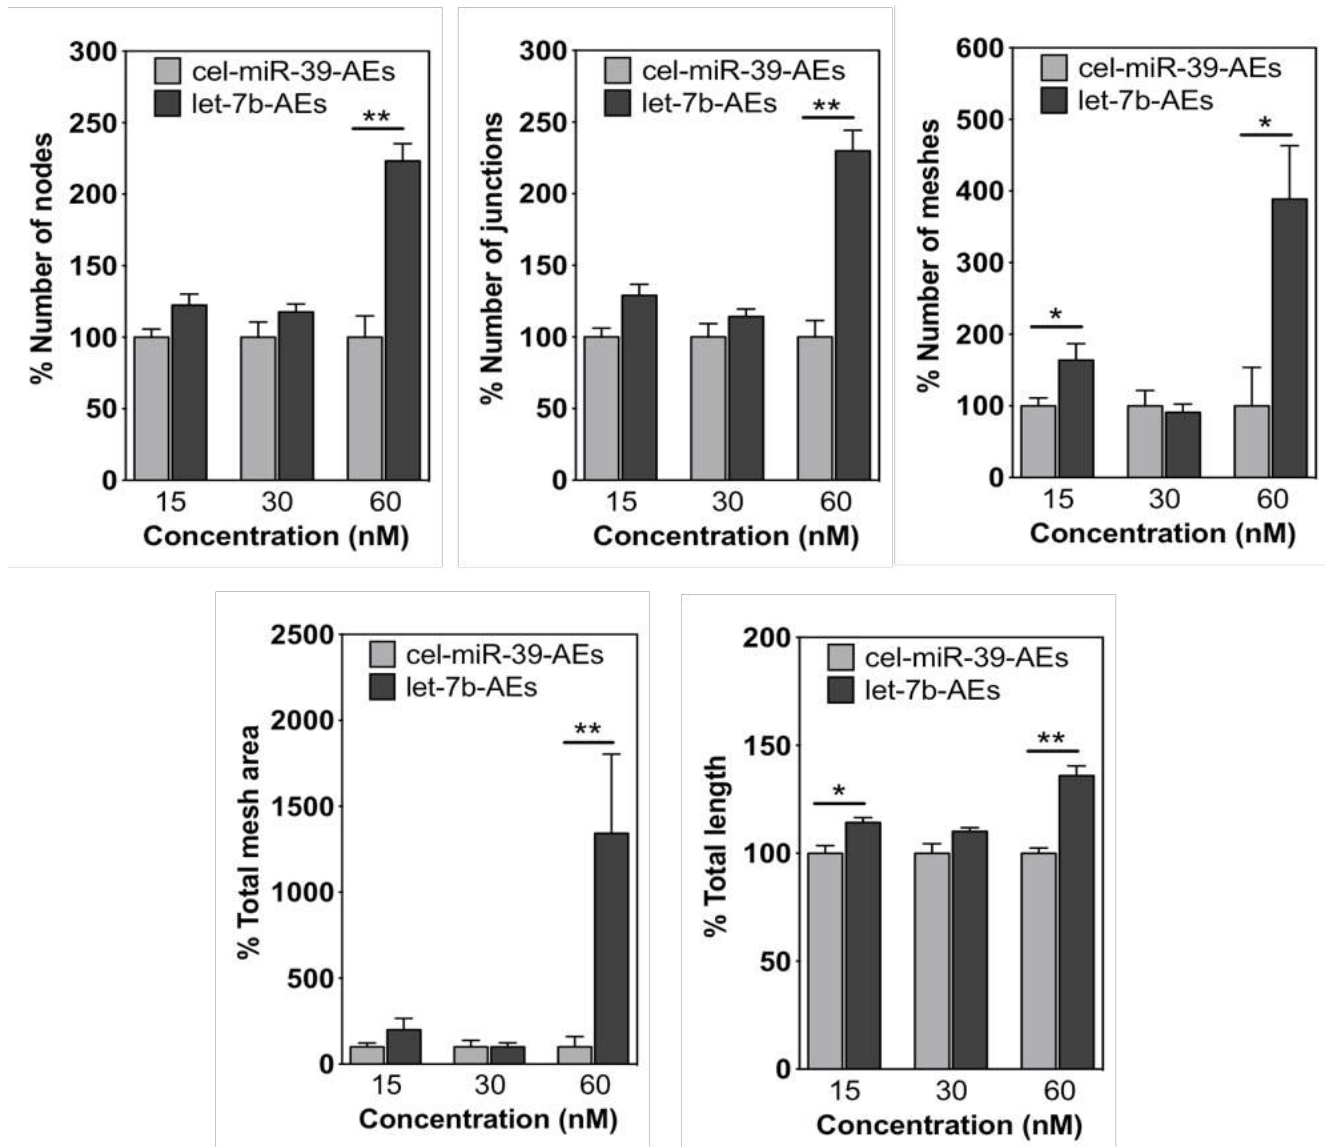

Figure S13. Additional parameters of Matrigel for HUVECs treated with cel-miR-39-AEs or let-7b-AEs under hypoxic conditions (1% O<sub>2</sub>). In all graphs, values are given as average ± SEM (n=5). \**P* ≤ 0.05, \*\**P* ≤ 0.01, \*\*\**P* ≤ 0.001, and \*\*\*\**P* ≤ 0.0001.

Figure S14

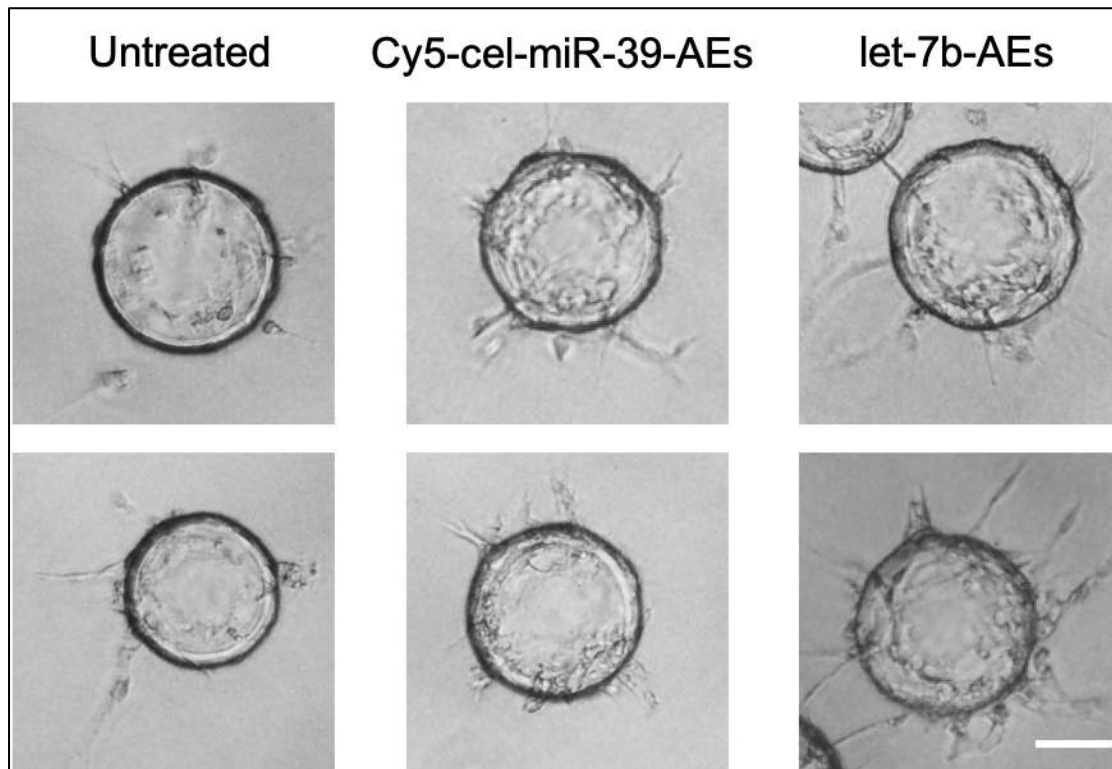

**Figure S14. Higher magnification images for fibrin gel bead assay.** Images of individual beads from different experimental conditions show the sprouts in fibrin gel. Scale bar, 75  $\mu\text{m}$ .

Figure S15

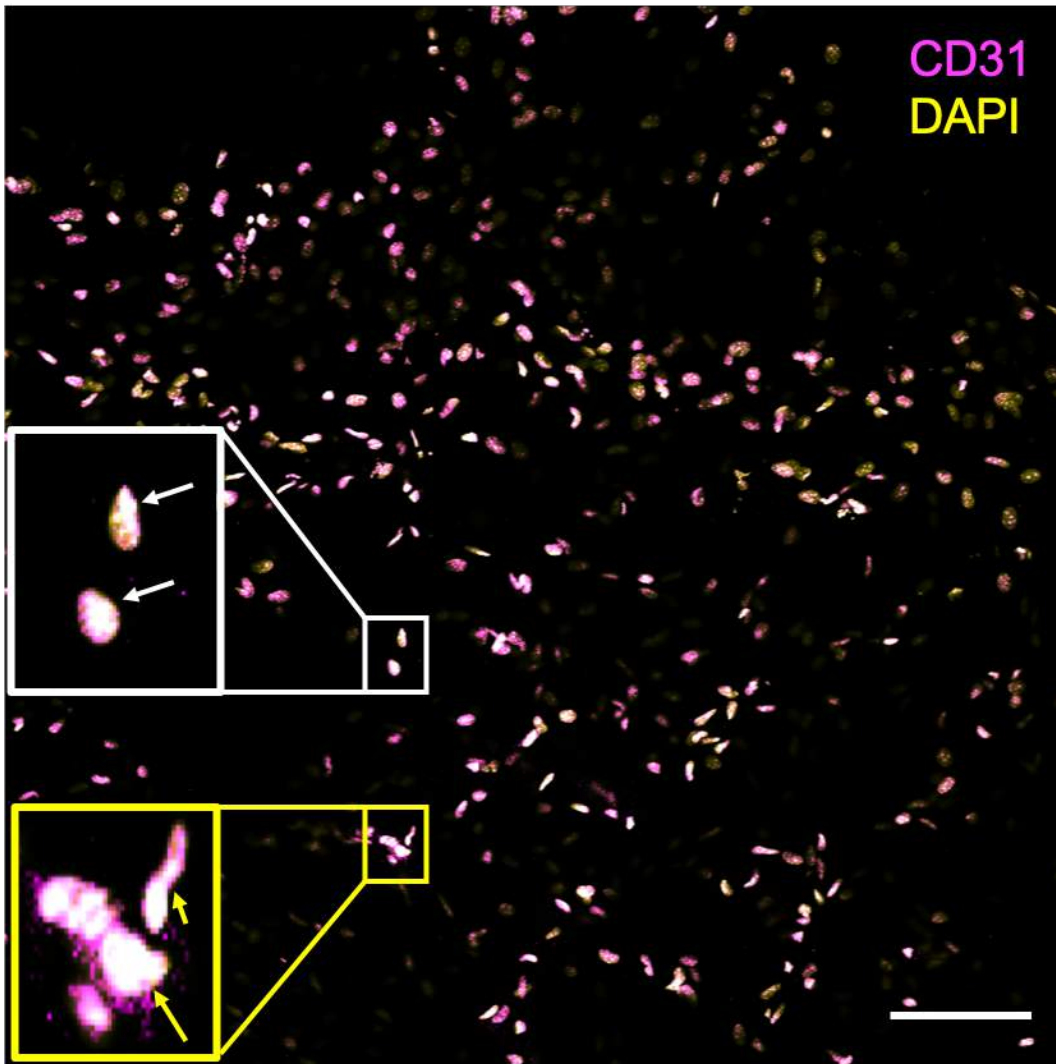

**Figure S15. Identification of vessel like structures in xenograft Matrigel plugs.** Individual ECs (CD31<sup>+</sup>DAPI<sup>+</sup>) can be seen (white box, white arrows) but also 'vessel-like structures' comprising elongated fragments of multiple CD31<sup>+</sup>DAPI<sup>+</sup> (yellow box, yellow arrows). In image, pseudocolors were used (red channel shown in magenta and blue channel in yellow) to make cells easier to see. Scale bar, 50  $\mu$ m.



## **Supplemental Tables.**

**Table S1.** miRNA Panel for pericardial fluid extracellular vesicles. AVR: Aortic valve replacement, CABG: coronary artery bypass graft. When the  $Ct \geq 40$ , the miRNA was “undetermined”. If a miRNA was undetermined in any of the replicates from AVR patients, it was not considered for the analysis. The full data for miRNA panels can be found at GEO with accession number: GSE118103. cel-miR-39-3p, UniSp6 and UniSp3 IPC show spike-in controls. Table is uploaded separately as an Excel file (Table S1).

**Table S2.** miRNA Panel for human saphenous vein extracellular vesicles. When the  $Ct \geq 40$ , the miRNA was “undetermined”. If a miRNA was undetermined in any of the replicates, it was not considered for the analysis. The full data for miRNA panels can be found at GEO with accession number: GSE118855. cel-miR-39-3p, UniSp6 and UniSp3 IPC show spike-in controls.

| <i>miRNA Name</i>      | <i>Replicate-1</i> | <i>Replicate-2</i> | <i>Replicate-3</i> |
|------------------------|--------------------|--------------------|--------------------|
| <i>cel-miR-39-3p</i>   | 16.229             | 15.757             | 16.364             |
| <i>UniSp6</i>          | 17.197             | 17.208             | 17.348             |
| <i>UniSp3 IPC</i>      | 18.238             | 18.221             | 17.965             |
| <i>UniSp3 IPC</i>      | 18.317             | 18.228             | 18.141             |
| <i>UniSp3 IPC</i>      | 18.216             | 18.361             | 18.150             |
| <i>UniSp3 IPC</i>      | 18.208             | 18.457             | 18.134             |
| <i>UniSp3 IPC</i>      | 18.408             | 18.191             | 18.240             |
| <i>UniSp3 IPC</i>      | 18.575             | 18.435             | 18.224             |
| <i>hsa-miR-27b-5p</i>  | 32.947             | 13.979             | 14.243             |
| <i>hsa-miR-100-5p</i>  | 32.480             | 32.174             | 30.391             |
| <i>hsa-miR-21-5p</i>   | 33.930             | 31.704             | 29.722             |
| <i>hsa-miR-125b-5p</i> | 32.787             | 32.456             | 30.240             |
| <i>hsa-miR-1260a</i>   | 32.874             | 32.516             | 31.227             |
| <i>hsa-miR-451a</i>    | 32.856             | 33.519             | 30.276             |
| <i>hsa-miR-23a-3p</i>  | 34.909             | 31.704             | 30.740             |
| <i>hsa-miR-221-3p</i>  | 34.033             | 33.419             | 30.070             |
| <i>hsa-miR-24-3p</i>   | 35.239             | 32.023             | 31.057             |
| <i>hsa-miR-191-5p</i>  | 26.626             | 38.674             | 33.528             |
| <i>hsa-let-7a-5p</i>   | 32.510             | 34.447             | 31.921             |
| <i>hsa-miR-34a-3p</i>  | 34.341             | 32.978             | 33.128             |
| <i>hsa-let-7b-5p</i>   | 34.627             | 33.975             | 31.859             |
| <i>hsa-miR-19b-3p</i>  | 33.632             | 34.969             | 32.124             |
| <i>hsa-miR-222-3p</i>  | 37.534             | 33.988             | 31.461             |
| <i>hsa-miR-92a-3p</i>  | 35.631             | 34.117             | 33.308             |
| <i>hsa-miR-31-5p</i>   | 36.593             | 33.619             | 32.911             |
| <i>hsa-miR-29a-3p</i>  | 36.174             | 35.221             | 32.281             |
| <i>hsa-miR-23b-3p</i>  | 38.060             | 34.391             | 31.798             |
| <i>hsa-miR-16-5p</i>   | 34.627             | 39.478             | 30.423             |
| <i>hsa-miR-127-3p</i>  | 34.238             | 37.329             | 33.367             |

|                        |        |        |        |
|------------------------|--------|--------|--------|
| <i>hsa-miR-548c-5p</i> | 34.714 | 35.109 | 35.602 |
| <i>hsa-miR-188-3p</i>  | 34.988 | 34.782 | 35.664 |
| <i>hsa-miR-663b</i>    | 36.968 | 35.945 | 33.525 |
| <i>hsa-miR-142-3p</i>  | 35.333 | 37.926 | 34.219 |
| <i>hsa-miR-29c-3p</i>  | 37.355 | 36.513 | 33.788 |
| <i>hsa-miR-27a-5p</i>  | 34.805 | 36.540 | 36.402 |
| <i>hsa-miR-144-3p</i>  | 36.876 | 35.638 | 35.267 |
| <i>hsa-miR-940</i>     | 35.028 | 38.869 | 34.493 |
| <i>hsa-miR-376c-3p</i> | 36.825 | 39.130 | 32.699 |
| <i>hsa-miR-1972</i>    | 38.216 | 36.918 | 34.256 |
| <i>hsa-miR-329-3p</i>  | 36.989 | 37.812 | 36.004 |
| <i>hsa-miR-1471</i>    | 38.905 | 38.457 | 38.050 |
| <i>hsa-miR-23a-5p</i>  | 39.374 | 38.768 | 39.076 |

**Table S3.** Info for the patients whose small extracellular vesicles were used in PF miRNA panels. NYHA: New York Heart Association Classification.

|                         | Age | Gender | Diabetes | CABG Vessel # | Hypertension | NYHA |
|-------------------------|-----|--------|----------|---------------|--------------|------|
| <b>CABG Replicate-1</b> | 62  | M      | No       | 2             | Yes          | II   |
| <b>CABG Replicate-2</b> | 56  | M      | No       | 2             | Yes          | II   |
| <b>CABG Replicate-3</b> | 68  | M      | No       | 3             | Yes          | II   |
| <b>CABG Replicate-4</b> | 71  | M      | No       | 3             | Yes          | II   |
| <b>AVR Replicate-1</b>  | 83  | M      | No       | N/A           | Yes          | II   |
| <b>AVR Replicate-2</b>  | 66  | M      | No       | N/A           | Yes          | II   |
| <b>AVR Replicate-3</b>  | 76  | M      | No       | N/A           | Yes          | III  |
| <b>AVR Replicate-4</b>  | 76  | M      | No       | N/A           | Yes          | II   |

**Table S4.** Major Resources Table**Animals (*in vivo* studies)**

| Species | Vendor or Source | Background Strain                   | Sex | Persistent ID / URL                                                                                                                                                           |
|---------|------------------|-------------------------------------|-----|-------------------------------------------------------------------------------------------------------------------------------------------------------------------------------|
| Mouse   | Charles River    | CrI:CD1- <i>Foxn1</i> <sup>nu</sup> | M   | <a href="https://www.criver.com/products-services/find-model/cd-1-nude-mouse?region=3611">https://www.criver.com/products-services/find-model/cd-1-nude-mouse?region=3611</a> |

**Antibodies/Other Reagents**

| Target antigen | Vendor or Source       | Catalog #   | Working concentration                                     | Lot #                  | Persistent ID / URL                                                                                                                                                                                                                                                                         |
|----------------|------------------------|-------------|-----------------------------------------------------------|------------------------|---------------------------------------------------------------------------------------------------------------------------------------------------------------------------------------------------------------------------------------------------------------------------------------------|
| Human CD31     | Abcam                  | ab28364     | 1:50                                                      | GR3247742-11           | <a href="https://www.abcam.com/cd31-antibody-ab28364.html">https://www.abcam.com/cd31-antibody-ab28364.html</a>                                                                                                                                                                             |
| Rabbit IgG     | Jackson Immunoresearch | 711-605-152 | 1:200                                                     | 132485                 | <a href="https://www.jacksonimmuno.com/catalog/products/711-605-152">https://www.jacksonimmuno.com/catalog/products/711-605-152</a>                                                                                                                                                         |
| Matrigel       | Corning                | 354230      | Not diluted ( <i>in vitro</i> )<br>1:2 ( <i>in vivo</i> ) | 6032001<br>(9.3 mg/mL) | <a href="https://ecatalog.corning.com/life-sciences/b2c/US/en/Surfaces/Extracellular-Matrices-ECMs/Corning%C2%AE-Matrigel%C2%AE-Matrix/p/354230">https://ecatalog.corning.com/life-sciences/b2c/US/en/Surfaces/Extracellular-Matrices-ECMs/Corning%C2%AE-Matrigel%C2%AE-Matrix/p/354230</a> |
| Matrigel       | Corning                | 354230      | Diluted 1:2 ( <i>in vivo</i> )                            | 9028255<br>(8.6 mg/mL) | <a href="https://ecatalog.corning.com/life-sciences/b2c/US/en/Surfaces/Extracellular-Matrices-ECMs/Corning%C2%AE-Matrigel%C2%AE-Matrix/p/354230">https://ecatalog.corning.com/life-sciences/b2c/US/en/Surfaces/Extracellular-Matrices-ECMs/Corning%C2%AE-Matrigel%C2%AE-Matrix/p/354230</a> |

**Cultured Cells**

| Name                                                       | Vendor or Source                            | Sex (F, M, or unknown) | Persistent ID / URL                                                                                                                             |
|------------------------------------------------------------|---------------------------------------------|------------------------|-------------------------------------------------------------------------------------------------------------------------------------------------|
| Human umbilical vein endothelial cells (HUVEC)             | LONZA (Cat#C2519A)                          | M                      | Lot# 0000437550                                                                                                                                 |
| Human cardiac microvascular endothelial cells (cHMVEC)     | LONZA (Cat#CC-7030)                         | M                      | Lot# 0000399195                                                                                                                                 |
| Human bone marrow-derived mesenchymal stem cells (BM-MSCs) | Rooster Bio (RoosterVial-hBM-10M [MSC-001]) | M                      | <a href="https://www.roosterbio.com/products/roostervial-hbm-10m-msc-001/">https://www.roosterbio.com/products/roostervial-hbm-10m-msc-001/</a> |

**Data & Code Availability**

| Description                                                         | Source / Repository | Persistent ID / URL |
|---------------------------------------------------------------------|---------------------|---------------------|
| miRNA Panel Data for Human Pericardial Fluid Extracellular Vesicles | GEO                 | GSE118103           |
| miRNA Panel Data for Human Saphenous Vein Extracellular Vesicles    | GEO                 | GSE118855           |
| miRNA Array Data for Mesenchymal Stem Cell Extracellular Vesicles   | GEO                 | GSE71241            |

**Table S5.** ID numbers for Taqman<sup>®</sup> primers used in qRT-PCR experiments.

| <b>Oligo Name</b>    | <b>miRbase Accession Number</b> | <b>Assay ID</b> |
|----------------------|---------------------------------|-----------------|
| cel-miR-39-3p        | MIMAT0000010                    | 000200          |
| let-7a-5p            | MIMAT0000062                    | 000377          |
| let-7b-5p            | MIMAT0000063                    | 002619          |
| U6 small nuclear RNA | N/A                             | 001973          |

**Table S6.** Sequences for the SYBR<sup>®</sup> Green primers used in qRT-PCR experiments.

| <b>Oligo Name</b> | <b>Forward Sequence</b> | <b>Reverse Sequence</b> |
|-------------------|-------------------------|-------------------------|
| APAF1             | AAGCTCTCCAAATTGAAAGG    | CCTTCTAAAGGGAATGATCTC   |
| CASP3             | AAAGCACTGGAATGACATC     | CGCATCAATTCCACAATTC     |
| CTNNB1            | CAACTAAACAGGAAGGGATG    | CACAGGTGACCACATTTATATC  |
| FZD4              | GCAGTTCTTCCTTTGTTCTG    | AGGCAAATCCAAATTCCTTC    |
| GAPDH             | CTGGGCTACACTGAGCACC     | AAGTGGTCGTTGAGGGCAATG   |
| HMGA2             | AGCTCAAAGAAAGCAGAAG     | CCCTTCAAAGATCCAACCTG    |
| STARD13           | AGGATTCACAATTTCCCATC    | AAAGAGGTTCTACAAGGTCC    |

**Table S7.** Gene targets of synergistic miRNA regulation for let-7a and let-7b were determined using TriplexRNA database.

| <b>GENE ID</b>  | <b>REFSEQ ID</b> | <b>MIRN A1 ID</b> | <b>MIRN A2 ID</b> | <b>SEED DISTANCE (NT)</b> | <b>TRIPLEX ID</b> | <b>FREE ENERGY (KCAL/MOL)</b> | <b>ENERGY GAIN (KCAL/MOL)</b> | <b>SEED BINDING</b> | <b>PATTERN</b>              |
|-----------------|------------------|-------------------|-------------------|---------------------------|-------------------|-------------------------------|-------------------------------|---------------------|-----------------------------|
| <b>GGA3</b>     | NM_138619        | hsa-let-7a        | hsa-let-7b        | 30                        | 39186             | -37.86                        | -12.08                        | Yes                 | Target self-complementarity |
| <b>KCTD14</b>   | NM_023930        | hsa-let-7a        | hsa-let-7b        | 28                        | 163780            | -31.86                        | -8.18                         | Yes                 | Canonical triplex           |
| <b>KCTD14</b>   | NM_023930        | hsa-let-7a        | hsa-let-7b        | 28                        | 163786            | -31.76                        | -8.18                         | Yes                 | Canonical triplex           |
| <b>CTPS2</b>    | NM_019857        | hsa-let-7a        | hsa-let-7b        | 24                        | 165638            | -42.26                        | -19.08                        | Yes                 | Canonical triplex           |
| <b>NQO1</b>     | NM_000903        | hsa-let-7a        | hsa-let-7b        | 18                        | 184240            | -31.76                        | -11.98                        | Yes                 | Canonical triplex           |
| <b>CISH</b>     | NM_145071        | hsa-let-7a        | hsa-let-7b        | 16                        | 225705            | -31.16                        | -12.78                        | Yes                 | Canonical triplex           |
| <b>HOXA1</b>    | NM_153620        | hsa-let-7a        | hsa-let-7b        | 18                        | 238991            | -35.76                        | -8.48                         | Yes                 | Target self-complementarity |
| <b>STARD13</b>  | NM_178006        | hsa-let-7a        | hsa-let-7b        | 17                        | 258303            | -26.56                        | -8.48                         | Yes                 | Canonical triplex           |
| <b>C18ORF21</b> | NM_031446        | hsa-let-7a        | hsa-let-7b        | 32                        | 310565            | -35.16                        | -7.18                         | Yes                 | Canonical triplex           |
| <b>IL10</b>     | NM_000572        | hsa-let-7a        | hsa-let-7b        | 23                        | 413608            | -29.46                        | -11.78                        | Yes                 | Canonical triplex           |
| <b>IL10</b>     | NM_000572        | hsa-let-7a        | hsa-let-7b        | 32                        | 413619            | -30.76                        | -11.68                        | Yes                 | Canonical triplex           |
| <b>FASLG</b>    | AF288573         | hsa-let-7a        | hsa-let-7b        | 22                        | 419431            | -33.86                        | -5.98                         | No                  | Target self-complementarity |
| <b>HMGA2</b>    | NM_003483        | hsa-let-7a        | hsa-let-7b        | 19                        | 504515            | -33.86                        | -11.58                        | Yes                 | Canonical triplex           |
| <b>DLC1</b>     | NM_182643        | hsa-let-7a        | hsa-let-7b        | 26                        | 651299            | -27.06                        | -8.88                         | Yes                 | Canonical triplex           |
| <b>EPB41L4A</b> | NM_022140        | hsa-let-7a        | hsa-let-7b        | 30                        | 655303            | -28.46                        | -12.08                        | No                  | Canonical triplex           |



**Table S8.** miRNA sequences used in the preparation of AEs.

| <b>Oligo Name</b>       | <b>Sequence (5'-3')</b>                          |
|-------------------------|--------------------------------------------------|
| cel-miR-39-3p-sense     | [AmC6F]CAAGCUGAUUUACACCCGGUUGA[dT][dT][Cyanine5] |
| cel-miR-39-3p-antisense | UCACCGGGUGUAAAUCAGCUUG                           |
| let-7b-5p-sense         | [AmC6F]AACCACACAACCUACUACCUUCA[dT][dT]           |
| let-7b-5p-antisense     | UGAGGUAGUAGGUUGUGUGGUU                           |
